# Supplementary material for: Enhancement of Sphingomyelinase-Induced Endothelial Nitric Oxide Synthase-Mediated Vasorelaxation in a Murine Model of Type 2 Diabetes
Source: MDPI journal article supplement (doi:10.3390/ijms24098375), 2023-05-06
Supplement: s1 [file s1]

Figure S1.

A

| control | db/db |
|---------|-------|
| 24.8    | 43.6  |
| 23.8    | 49.2  |
| 25.8    | 38.4  |
| 26.4    | 46.3  |
| 34      | 51.2  |
| 24.7    | 47.3  |
| 35.7    | 38.9  |
| 31.9    | 51.4  |
| 26      | 49.3  |
| 26.3    | 55.3  |
| 24.7    | 52    |
| 24.6    | 55.8  |
| 36.4    | 63.6  |
| 28.4    | 67    |
| 24      | 67    |
| 27      | 65    |
| 23.4    | 64.2  |
| 33      | 53.9  |
| 32.5    | 52.3  |
| 30.1    | 48.3  |
| 26.4    | 39.9  |
| 30.7    | 27.3  |

B

| control | db/db |
|---------|-------|
| 15.1    | 21.6  |
| 12.4    | 40.8  |
| 10.4    | 25.8  |
| 15.5    | 43.8  |
| 9.3     | 33.8  |
| 11      | 43    |
| 11      | 40    |
| 11.5    | 19.7  |
| 14.1    | 33    |
| 11.8    | 22.8  |
| 10.1    | 30.1  |
| 13.3    | 16.4  |
| 13.2    | 26.6  |
| 6.5     | 26.6  |
| 10.5    | 21.8  |
| 10.1    | 28.8  |
| 11.4    | 36.6  |
| 8.8     | 25.6  |
| 7.7     | 28.4  |
| 9.3     | 29    |
| 8.4     | 54.6  |

C

| control | db/db  |
|---------|--------|
| 44.66   | 43.24  |
| 8.86    | 80.48  |
| 18.89   | 77.61  |
| 14.59   | 36.07  |
| 17.45   | 93.37  |
| 51.83   | 90.51  |
| 33.21   | 137.77 |
| 4.12    | 36.07  |
| 1.42    | 17.07  |
| 14.55   | 1.42   |
| 31.29   | 182.49 |
| 1.42    | 19.77  |
| 1.42    | 82.21  |
|         | 23.61  |

D

| control |        |        |        |        |  | db/db  |        |        |        |        |
|---------|--------|--------|--------|--------|--|--------|--------|--------|--------|--------|
| Ach -9  | Ach -8 | Ach -7 | Ach -6 | Ach -5 |  | Ach -9 | Ach -8 | Ach -7 | Ach -6 | Ach -5 |
| 1.81    | 18.41  | 82.29  | 86.47  | 86.89  |  | 0.78   | 7.20   | 49.81  | 53.52  | 53.52  |
| 3.08    | 14.84  | 70.13  | 70.13  | 71.87  |  | 3.23   | 17.96  | 39.56  | 39.56  | 39.56  |
| 14.11   | 42.47  | 77.53  | 77.53  | 77.53  |  | 0.00   | 3.61   | 25.10  | 41.29  | 41.29  |
| 1.40    | 21.66  | 57.47  | 64.49  | 64.49  |  | 0.00   | 6.47   | 45.96  | 45.96  | 45.96  |
| 1.68    | 3.53   | 51.68  | 62.52  | 62.52  |  | 0.00   | 11.30  | 66.28  | 75.37  | 75.37  |
| 1.15    | 1.15   | 6.76   | 42.89  | 42.89  |  | 0.00   | 2.41   | 20.13  | 20.13  | 20.13  |
| 9.16    | 17.88  | 46.78  | 64.23  | 64.23  |  | 0.73   | 0.73   | 72.38  | 75.63  | 75.63  |
| 0.00    | 33.06  | 76.63  | 76.94  | 83.78  |  | 1.38   | 1.76   | 80.20  | 80.20  | 80.20  |
| 5.33    | 12.92  | 74.50  | 75.75  | 80.33  |  | 0.00   | 3.55   | 17.27  | 52.49  | 56.09  |
| 0.00    | 0.00   | 12.37  | 27.34  | 27.34  |  | 0.00   | 0.00   | 13.51  | 44.59  | 46.39  |
| 0.00    | 4.13   | 32.26  | 57.68  | 57.68  |  | 0.00   | 2.34   | 33.64  | 55.65  | 55.65  |
| 0.00    | 0.00   | 29.35  | 68.75  | 68.75  |  | 0.00   | 0.00   | 26.12  | 36.85  | 36.85  |
|         |        |        |        |        |  | 0.00   | 0.46   | 52.41  | 57.03  | 57.03  |
|         |        |        |        |        |  | 0.00   | 19.51  | 41.09  | 50.55  | 50.55  |
|         |        |        |        |        |  | 2.95   | 2.95   | 32.15  | 49.97  | 49.97  |
|         |        |        |        |        |  | 2.73   | 2.73   | 22.70  | 49.20  | 49.20  |
|         |        |        |        |        |  | 0.00   | 0.00   | 26.81  | 34.27  | 34.27  |
|         |        |        |        |        |  | 0.00   | 0.00   | 9.36   | 32.32  | 32.32  |
|         |        |        |        |        |  | 0.00   | 3.52   | 44.94  | 67.74  | 67.74  |
|         |        |        |        |        |  | 0.00   | 0.00   | 38.14  | 74.26  | 74.26  |
|         |        |        |        |        |  | 10.26  | 10.26  | 43.36  | 59.32  | 67.48  |
|         |        |        |        |        |  | 3.64   | 3.64   | 32.18  | 39.95  | 43.76  |
|         |        |        |        |        |  | 0.00   | 0.00   | 16.67  | 29.87  | 33.02  |
|         |        |        |        |        |  | 0.00   | 0.00   | 23.20  | 30.26  | 40.10  |

E

| control     |        |        |            |            |            |  | db/db       |        |        |        |            |        |
|-------------|--------|--------|------------|------------|------------|--|-------------|--------|--------|--------|------------|--------|
| SNP -<br>10 | SNP -9 | SNP -8 | SNP -<br>7 | SNP -<br>6 | SNP -<br>5 |  | SNP -<br>10 | SNP -9 | SNP -8 | SNP -7 | SNP -<br>6 | SNP -5 |
| 1.19        | 5.95   | 53.21  | 87.38      | 100.83     | 104.40     |  | 0.00        | 0.00   | 60.94  | 98.78  | 106.97     | 113.43 |
| 2.73        | 8.77   | 44.44  | 81.29      | 96.88      | 102.14     |  | 0.00        | 0.00   | 65.35  | 92.74  | 99.35      | 102.23 |
| 12.94       | 24.47  | 63.06  | 89.65      | 110.59     | 104.00     |  | 0.00        | 3.54   | 40.36  | 83.60  | 95.74      | 99.94  |
| 6.99        | 12.50  | 45.04  | 78.68      | 96.69      | 103.31     |  | 0.00        | 0.00   | 39.27  | 81.84  | 96.93      | 100.60 |
| 0.00        | 0.00   | 51.03  | 82.34      | 99.73      | 104.37     |  | 0.00        | 0.00   | 48.34  | 87.70  | 97.48      | 101.70 |
| 0.00        | 0.00   | 52.39  | 79.57      | 90.12      | 96.38      |  | 0.00        | 0.00   | 8.95   | 79.10  | 92.50      | 98.55  |
| 4.49        | 16.47  | 58.38  | 92.22      | 102.40     | 103.29     |  | 0.00        | 0.00   | 33.01  | 95.10  | 109.58     | 114.25 |
| 2.59        | 2.59   | 60.00  | 107.41     | 112.82     | 113.18     |  | 0.00        | 0.00   | 58.20  | 94.77  | 102.08     | 108.45 |
| 1.66        | 12.81  | 51.96  | 100.47     | 112.34     | 112.34     |  | 0.00        | 2.12   | 32.90  | 91.21  | 99.09      | 106.97 |
| 2.00        | 8.09   | 63.27  | 96.67      | 107.99     | 110.09     |  | 0.00        | 0.00   | 21.16  | 92.86  | 105.81     | 112.13 |
| 0.00        | 0.00   | 55.56  | 96.00      | 108.00     | 112.74     |  | 0.00        | 0.00   | 15.54  | 80.58  | 100.14     | 108.76 |
| 0.00        | 0.00   | 36.05  | 77.36      | 103.30     | 106.60     |  | 0.00        | 0.00   | 56.11  | 92.53  | 103.55     | 107.04 |
|             |        |        |            |            |            |  | 0.00        | 0.00   | 29.79  | 88.25  | 98.23      | 102.23 |
|             |        |        |            |            |            |  | 0.00        | 0.00   | 53.79  | 83.45  | 95.86      | 97.93  |
|             |        |        |            |            |            |  | 0.00        | 0.00   | 44.71  | 87.67  | 97.15      | 100.55 |
|             |        |        |            |            |            |  | 0.00        | 0.00   | 34.01  | 84.61  | 97.30      | 102.39 |
|             |        |        |            |            |            |  | 0.00        | 0.00   | 8.28   | 66.63  | 83.96      | 93.85  |

Figure S2.

A

Data table contains 51 + 49 columns (aorta samples from control and db/db mice) times 1200 rows (one registered data point every second for 20 minutes). Can be sent upon request from the corresponding author (benyo.zoltan@med.semmelweis-univ.hu).

B

| control   | db/db     |
|-----------|-----------|
| 76173.49  | -12282.53 |
| 20960.91  | -21343.18 |
| -7237.95  | -53502.12 |
| 8806.94   | -21960.38 |
| -16377.69 | -15816.39 |
| 1387.52   | -22671.05 |
| -1924.60  | 6833.89   |
| 67600.51  | 6450.95   |
| 6889.60   | -13653.05 |
| 28803.92  | 12017.17  |
| 18428.14  | 7817.29   |
| -4868.91  | 48774.09  |
| 30225.56  | -12947.30 |
| 29257.07  | -34694.24 |
| 8557.75   | -17831.47 |
| -4787.73  | -49123.05 |
| -9692.02  | -38554.00 |
| -11434.69 | -24872.85 |
| 1158.19   | -25884.86 |
| -10716.90 | -56220.22 |
| -33701.45 | -15993.37 |
| 3067.16   | 1168.05   |
| 41664.31  | 6602.33   |
| 31150.52  | -10340.74 |
| 5479.31   | 14380.50  |
| 16415.47  | -1519.42  |
| 4055.17   | -27508.79 |
| 37127.61  | 23040.57  |
| 46661.33  | -8571.76  |
| 16808.98  | -2605.97  |
| 51559.84  | 7126.86   |
| 14985.08  | -25698.89 |
| 42325.89  | 8132.12   |
| 18718.03  | -3254.83  |
| 12934.94  | -32251.31 |

|           |           |
|-----------|-----------|
| 1905.85   | -28788.81 |
| 4571.66   | -31869.88 |
| 5586.14   | 29809.47  |
| -3849.76  | 1418.87   |
| 18496.31  | 3209.14   |
| -5513.20  | 14683.24  |
| 13521.71  | 26707.13  |
| -5761.43  | 37520.84  |
| 30504.10  | -14066.74 |
| -23126.48 | -3857.31  |
| 25148.97  | 14334.78  |
| -3456.05  | -20948.78 |
| 8251.47   | -10953.56 |
| 28740.57  | -20967.13 |
| 12796.88  |           |
| 15741.58  |           |

C

| control | db/db  |
|---------|--------|
| 130.80  | -48.35 |
| 116.45  | -39.57 |
| -33.81  | -65.98 |
| 42.13   | -66.42 |
| -48.86  | -62.62 |
| 35.61   | -45.33 |
| 55.07   | 10.71  |
| 98.71   | -30.34 |
| 39.05   | -35.61 |
| 66.67   | 47.81  |
| 70.87   | 13.82  |
| -24.22  | 69.46  |
| 45.58   | -40.07 |
| 33.17   | -79.20 |
| 29.18   | -58.11 |
| -13.89  | -64.09 |
| -30.32  | -67.54 |
| -31.69  | -46.51 |
| -22.13  | -50.14 |
| -20.59  | -74.52 |
| -43.22  | -35.01 |
| 16.98   | 10.90  |

|        |        |
|--------|--------|
| 47.20  | 12.37  |
| 36.42  | -29.89 |
| 11.15  | 27.65  |
| 20.62  | -18.64 |
| 12.98  | -36.83 |
| 43.90  | 41.46  |
| 56.64  | -63.66 |
| 25.63  | -33.82 |
| 74.53  | 22.49  |
| 27.00  | -34.15 |
| 52.48  | 13.09  |
| 26.49  | -58.52 |
| 19.73  | -49.74 |
| 11.56  | -74.92 |
| 13.99  | -59.91 |
| 15.82  | 58.11  |
| -15.35 | -50.34 |
| 31.54  | -44.81 |
| -43.23 | -31.54 |
| 19.22  | 58.19  |
| -13.81 | 69.23  |
| 38.53  | -30.64 |
| -45.32 | -58.10 |
| 36.73  | 26.08  |
| -25.07 | -74.52 |
| 37.17  | -24.56 |
| 45.58  | -77.74 |
| 19.30  |        |
| 37.34  |        |

Figure S3.

A

Data table contains 20 + 20 columns (aorta samples from control and db/db mice) times 1200 rows (one registered data point every second for 20 minutes). Can be sent upon request from the corresponding author (benyo.zoltan@med.semmelweis-univ.hu).

B

| control   | db/db     |
|-----------|-----------|
| -34275.63 | -33340.19 |
| -46184.43 | -22019.32 |

|           |           |
|-----------|-----------|
| 15773.53  | -38984.76 |
| 8624.41   | -18256.83 |
| 8303.24   | -18819.10 |
| -10476.81 | -19506.19 |
| 3199.94   | -30397.64 |
| -6091.18  | -17615.86 |
| -6085.67  | -13057.16 |
| -26869.72 | -23396.83 |
| 4309.81   | -81987.19 |
| 744.68    | -71412.78 |
| 8299.02   | 1390.10   |
| 12514.62  | -53867.95 |
| -593.11   | -52180.27 |
| 12081.60  | 5540.41   |
| -2104.43  | -17208.86 |
| -904.99   | -48989.87 |
| -34949.71 | -41524.78 |
| 13401.69  | -32845.20 |

C

| control | db/db   |
|---------|---------|
| -57.76  | -46.80  |
| -68.50  | -74.08  |
| 31.50   | -73.35  |
| 20.52   | -53.98  |
| -24.22  | -63.59  |
| -34.77  | -59.23  |
| -31.45  | -76.44  |
| -47.66  | -74.40  |
| -29.37  | -39.81  |
| -32.30  | -68.53  |
| -24.94  | -116.82 |
| -15.65  | -86.34  |
| -34.03  | -76.99  |
| 19.61   | -84.98  |
| -10.79  | -82.37  |
| 18.67   | 10.94   |
| -18.66  | -61.26  |
| -5.08   | -76.54  |
| -48.26  | -63.79  |
| 28.67   | -72.44  |

Figure S4.

A

Data table contains 9 + 17 columns (aorta samples from control and db/db mice) times 1200 rows (one registered data point every second for 20 minutes). Can be sent upon request from the corresponding author (benyo.zoltan@med.semmelweis-univ.hu).

B

| control  | db/db     |
|----------|-----------|
| 8021.32  | 1144.86   |
| 7372.66  | 1837.26   |
| 998.19   | 4901.99   |
| 12772.96 | 2216.74   |
| 4475.58  | 5425.83   |
| 5650.22  | 13434.54  |
| 4292.62  | 4754.04   |
| 20180.63 | 22914.27  |
| -130.57  | -60348.13 |
|          | 3783.88   |
|          | -1830.97  |
|          | 28916.15  |
|          | 31742.24  |
|          | 33819.68  |
|          | -20121.23 |
|          | 11578.17  |
|          | 30295.23  |

C

| control | db/db  |
|---------|--------|
| 11.57   | 4.57   |
| 11.12   | 3.76   |
| -4.77   | 7.88   |
| 14.58   | 3.57   |
| 5.89    | 6.46   |
| 8.32    | 16.76  |
| 6.03    | 5.51   |
| 34.75   | 31.17  |
| -11.96  | -74.46 |



|  |        |
|--|--------|
|  | -20.21 |
|  | -37.84 |
|  | 43.44  |
|  | 39.86  |
|  | 40.14  |
|  | -56.65 |
|  | 25.17  |
|  | 42.36  |

Figure S5.

A

Data table contains 5+5+4 columns (aorta samples from control and db/db mice) times 1200 rows (one registered data point every second for 20 minutes). Can be sent upon request from the corresponding author (benyo.zoltan@med.semmelweis-univ.hu).

B

| DMSO      | MAPP      | SKI-II   |
|-----------|-----------|----------|
| -27123.79 | -40614.84 | -52140.9 |
| -29757.79 | -56796.94 | -32138.0 |
| -49182.09 | -17145.67 | -48327.5 |
| -47886.42 | -49462.75 | -65138.6 |
| -50045.13 | -49149.72 |          |

C

| DMSO   | MAPP   | SKI-II |
|--------|--------|--------|
| -62.33 | -64.97 | -65.07 |
| -79.35 | -82.41 | -40.69 |
| -64.09 | -62.29 | -61.78 |
| -52.05 | -70.52 | -69.20 |
| -62.56 | -80.96 |        |
